# Supplementary material for: Similarities and differences in the regulation of HoxD genes during chick and mouse limb development
Source: PLoS Biol. 2018 Nov 26;16(11):e3000004. doi: 10.1371/journal.pbio.3000004 (PMC6283595; doi:10.1371/journal.pbio.3000004)
Supplement: S3 Table — Custom barcodes (4 bp shown by NNNN) were introduced in between the Illumina adapter sequences and the specific viewpoint sequences in order to multiplex and use different samples with the same viewpoint. 4C-seq, circular chromosome conformation capture sequencing; RT-qPCR, quantitative reverse transcription PCR. (XLSX) [file pbio.3000004.s011.xlsx]

## Sheet: Primer_information
	S3 Table. DNA sequences of primers used for both RT-qPCR analyses, genotyping and 4C-seq.
	RT-qPCR
	Name of gene		Sequence (5' -> 3')
	mGapdh	forward	TGCGACTTCAACAGCAACTC
		reverse	ATGTAGGCCATGAGGTCCAC
	mHoxd8	forward	GAGCTCGTCTCCTTCTCAAATGTT
		reverse	AGGTTTGTCTTCCTCTCCGTCTAC
	mHoxd9	forward	CTGAAGGAGGAGGAGAAGCA
		reverse	GTGTAGGGACAGCGCTTTTT
	mHoxd10	forward	GCCAGGAGCCCACTAAAGTC
		reverse	TGCTTTCCTTCTCCTGCACT
	mHoxd11	forward	CCGCAGCCTCTAACTTCTACA
		reverse	GCCTCGTAGAACTGATCAAAGC
	mHoxd12	forward	CTCTTGCCTGCGATCTTCACT
		reverse	GAATTCATTGACCAGGAATTCGTT
	mHoxd13	forward	GGTGTACTGTGCCAAGGATCAG
		reverse	CACATGTCCGGCTGGTTT
	mHoxa11	forward	GCCGTCTCGTCCAATTTCTA
		reverse	GTAGTCGGAGGAAGCGAGGT
	mHoxa13	forward	CTGGAACGGCCAAATGTACT
		reverse	CCTATAGGAGCTGGCGTCTG
	chGapdh	forward	GGTGGTGCTAAGCGTGTTA
		reverse	CCCTCCACAATGCCAA
	chHoxd8	forward	GTCTCCCGCTCAAATGTTTC
		reverse	CCTCGATTCGTCTCTTCCTG
	chHoxd9	forward	GCCATGAAAGCGAAGAAGTT
		reverse	GACCAGGAGGTGGAGAACAC
	chHoxd10	forward	TGAACTCGTTTCAGGGCTATT
		reverse	GACGTCCCTTCCTACCAGAG
	chHoxd11	forward	GGTGAGGCTGTTGCAGAGAA
		reverse	TCCTCGATCGCTGAGGAACT
	chHoxd12	forward	GCAGTCCAGTCATGCCTCAG
		reverse	ATTCGGCGATTTGCTGTTTT
	chHoxd13	forward	CACAGAGCTCGCACTTCTGG
		reverse	ATCTCGGGCTGGTTTAGTGC
	chHoxa11	forward	GCAGAGGAGATCATGCACAG
		reverse	GCCCACCGTGCTATAGAAAT
	chHoxa13	forward	AAGTGTACTGCCCCAAGGAG
		reverse	ACCTTTGTGTAGGGCACTCG
	Genotyping primer
	Name of strain		Sequence (5' -> 3')
	Del(Mtx-Ttn): wt	271	CCAGTGTTCTGACATTAAAGGGCAG
		272	CACTGGCTTACAGACAGGAAAAATTAGG
	Del(Mtx-Ttn): mutant	290	CCTGGGGTACCCTATTGGAGTC
		272	CACTGGCTTACAGACAGGAAAAATTAGG
	4C primer
	Name of viewpoint		Sequence (5' -> 3')	Genomic coordinates for excluded fragments during analysis	Barcode sequence (NNNN)
	mHoxd11	inverse forward	AATGATACGGCGACCACCGAACACTCTTTCCCTACACGACGCTCTTCCGATCTNNNNAAGCATACTTCCTCAGAAGAGGCA	chr2: 74,683,503-74,688,501 (mm10)	Bc14: AATT, Bc34: AGCC, Bc54: TTAA, Bc84: CGAT
		inverse reverse	CAAGCAGAAGACGGCATACGACTAGGAAAATTCCTAATTTCAGG
	mHoxd13	inverse forward	AATGATACGGCGACCACCGAACACTCTTTCCCTACACGACGCTCTTCCGATCTAAAATCCTAGACCTGGTCATG	chr2: 74,663,180-74,670,260 (mm10)
		inverse reverse	CAAGCAGAAGACGGCATACGAGGCCGATGGTGCTGTATAGG
	chHoxd10-11	inverse forward	AATGATACGGCGACCACCGAACACTCTTTCCCTACACGACGCTCTTCCGATCTGAGTCGCCGGCTCTTTCTATG	chr7: 16,370,905-16,378,558 (galGal5)
		inverse reverse	CAAGCAGAAGACGGCATACGAAGGACTTTGGCGTGCAGAC
	chHoxd12	inverse forward	AATGATACGGCGACCACCGAACACTCTTTCCCTACACGACGCTCTTCCGATCTNNNNAATACCGGACTCGCAAGG	chr7: 16,382,849-16,387,653 (galGal5)	A14: ATCG, C44: CTGT
		inverse reverse	CAAGCAGAAGACGGCATACGAGCTGAAGTCCTTTGTTGGA
	chHoxd13	inverse forward	AATGATACGGCGACCACCGAACACTCTTTCCCTACACGACGCTCTTCCGATCTAGAAATTCACATTTCAAAGGGTTGAC	chr7: 16,391,744-16,396,736 (galGal5)
		inverse reverse	CAAGCAGAAGACGGCATACGAGACGAAGTTTACTCAGTTGCTCCT
